# Supplementary material
Source: Royal Society of Chemistry journal article supplement (doi:10.1039/d5mh02072g)
Supplement: d5mh02072g1.pdf [file d5mh02072g1.pdf]

1 Supporting Information

2

3 Atomic-scale  $\text{RuS}_{2-x}$  Clusters with Rich-defect for

4 Efficient Electron Trap of Bacterial Respiratory

5 Chains

6 *Qingshan Liu<sup>1</sup>, Zhen Wan<sup>1</sup>, Ruoli Zhao<sup>2</sup>, Hao Zhang<sup>1</sup>, Yadong Zhe<sup>1</sup>, Jiarong Li<sup>2</sup>, Xiaoyu*

7 *Mu<sup>1,2\*</sup>, Xiao-Dong Zhang<sup>1,2\*</sup>*

8 <sup>1</sup> Tianjin Key Laboratory of Brain Science and Neural Engineering, Academy of Medical

9 Engineering and Translational Medicine, Tianjin University, Tianjin 300072, China

10 <sup>2</sup> Department of Physics and Tianjin Key Laboratory of Low Dimensional Materials Physics

11 and Preparing Technology, School of Sciences, Tianjin University, Tianjin 300350, China

12

13

## 1 **Materials and methods**

### 2 **Synthesis of RuS<sub>2-x</sub> clusters**

3 10.4 mg of RuCl<sub>3</sub> (Heowns, 99%) was dissolved in 20 mL of ultrapure water to prepare  
4 the Ru-precursor solution. 0.2 mL of 0.5 M Na<sub>2</sub>S (Aladdin, > 95%) solution was then added  
5 dropwise to the 5 mL RuCl<sub>3</sub> solution under vigorous stirring at room temperature. A clear  
6 brown solution containing RuS<sub>2-x</sub> clusters was formed. The RuS<sub>2-x</sub> clusters were subsequently  
7 collected by centrifugation (12,000 rpm, 10 min), washed three times with ultrapure water, and  
8 dried under vacuum overnight.

### 9 **Synthesis of RuSe<sub>2</sub> and RuTe<sub>2</sub> clusters**

10 RuSe<sub>2</sub> and RuTe<sub>2</sub> clusters were synthesized following previous literature with minor  
11 modifications. To prepare Se precursors, 80 mg of NaBH<sub>4</sub> (Aladdin, > 98%) was dispersed in  
12 1 mL of ultrapure water and 80 mg of Se powder (Heowns, > 99.9%) was added and stirred  
13 under N<sub>2</sub> protection. 20 min later, the black Se powder dissolved completely. Similarly, 1 mL  
14 of NaBH<sub>4</sub> solution (50 mg NaBH<sub>4</sub>) was mixed with 50 mg of Te powder (Heowns, > 99.9%)  
15 under N<sub>2</sub> protection. After 20 min, the black Te powder disappeared. Subsequently, 0.2 mL of  
16 the Se or Te precursors solution was added dropwise to 5 mL of RuCl<sub>3</sub> solution under vigorous  
17 stirring at room temperature. After an additional 10 min stirring, the product was collected by  
18 centrifugation (12000 rpm, 10 min), washed three times with ultrapure water, and dried under  
19 vacuum overnight.

### 20 **Instruments and characteristics**

21 Transmission electron microscopy (TEM) images were captured with a JEOL JEM-2100F  
22 instrument at 200 kV. The height of RuX<sub>2</sub> clusters was measured by atomic force microscopy  
23 (AFM, Dimension Icon, Bruker). X-ray photoelectron spectroscopy (XPS) was performed with  
24 a Thermo Escalab 250Xi instrument. X-ray diffraction (XRD) patterns were obtained using a  
25 Rigaku Rint 2500 diffractometer, which employs monochromated Cu K $\alpha$  radiation for accurate

1 analysis. The energy level structure of the RuX<sub>2</sub> clusters was determined by ultraviolet  
2 photoelectron spectroscopy (UPS, Axis Supra, Kratos Analytical Ltd, UK). Electron spin  
3 resonance (ESR) spectrum measurements were performed using an electron paramagnetic  
4 resonance spectrometer (Bruker EMX plus, Germany).

### 5 **Assessment of the peroxidase-like activity**

6 The POD-like activity of RuX<sub>2</sub> clusters was evaluated by monitoring the absorbance  
7 changes at 652 nm. For the colorimetric reaction, a mixture of 3,3',5,5'-tetramethylbenzidine  
8 (TMB, 0.1 mM) and H<sub>2</sub>O<sub>2</sub> (50 mM) was prepared, with TMB serving as the chromogenic  
9 substrate. Then, RuX<sub>2</sub> clusters were incubated with the mixture, and the increase in absorbance  
10 was directly proportional to the oxidation of TMB. To further investigate the reaction dynamics  
11 of RuX<sub>2</sub> clusters, the Michaelis-Menten kinetic model was applied to determine the Michaelis  
12 constant ( $K_m$ ) and the maximum reaction velocity ( $V_{max}$ ). The Michaelis-Menten constant was  
13 calculated as following equation:

$$14 \quad 1/V = (K_m/V_{max}) (1/[E] + 1/K_m)$$

15 The kinetic constant ( $K_{cat}$ ) was calculated based on the equation:

$$16 \quad K_{cat} = V_{max} / [E]$$

17 where  $V$  is the initial velocity,  $V_{max}$  represents the maximum reaction velocity,  $[E]$  is the  
18 concentration of substrate, and  $K_m$  corresponds to the Michaelis constant. By inverting both  
19 sides of the equation,  $V_{max}$  and  $K_m$  were determined from the corresponding double reciprocal  
20 plot.

### 21 **Detection of the GSHOx-like activity and steady-state kinetic analysis**

22 Glutathione (GSH) consumption was evaluated using Ellman's assay. Typically, 50  $\mu$ L of  
23 GSH (1 mM, Heowns, 98%) was treated with four groups: control, RuS<sub>2-x</sub>, RuSe<sub>2</sub>, RuTe<sub>2</sub>. The  
24 final working concentrations of GSH, DTNB 5,5-dithiobis (2-nitrobenzoic acid) (Heowns,  
25 98%), and catalyst were 1 mM, 200  $\mu$ g mL<sup>-1</sup> and 25  $\mu$ g mL<sup>-1</sup>, respectively. After incubation for

1 20 min at 37°C, 2  $\mu\text{L}$  of DTNB (20  $\text{mg mL}^{-1}$ ) was added to each group to record absorbance  
2 values at 412 nm. The steady-state kinetic was assessed with the catalyst in the presence of  
3 DTNB (200  $\mu\text{g mL}^{-1}$ ) and various GSH concentrations (0.05, 0.1, 0.25, 0.5, 1.0 and 2.0 mM).  
4 The absorbance was recorded by a UV-vis spectrophotometer ( $\epsilon=13600 \text{ M}^{-1} \text{ cm}^{-1}$  for TNB).  
5 The Michaelis-Menten constant was determined using the Lineweaver-Burk method,  $1/V =$   
6  $(K_m/V_{max}) (1/[E] + 1/K_m)$ . To verify the generation of hydrogen peroxide, different  
7 concentrations of  $\text{RuS}_{2-x}$  were added to the GSH solution and the absorbance at 240 nm was  
8 recorded by UV spectrophotometer.

### 9 **Bacteria current detection**

10 According to previous literature,<sup>[1, 2]</sup> the current-potential (I-V) curves were collected  
11 using a CHI660E electrochemical workstation with a 5 mM  $\text{K}_3[\text{Fe}(\text{CN})_6]$  (Heowns, > 98%)  
12 redox system. The catalyst served as the working electrode, while a platinum wire and saturated  
13 calomel electrode (SCE) as the counter electrode and reference electrode, respectively. The  
14 working electrode potential was scanned from -0.5 to 0.5 V. I-V curves were recorded both in  
15 the presence and absence of *E. coli*.

### 16 **Evaluation of antibacterial activity *in vitro***

17 The *in vitro* antibacterial efficacy of  $\text{RuX}_2$  clusters was assessed using the plate counting  
18 method. *Escherichia coli* (*E. coli*), *Staphylococcus aureus* (*S. aureus*), *Enterococcus faecium*,  
19 *Acinetobacter baumannii*, *Pseudomonas aeruginosa* and *Klebsiella Pneumoniae* were used to  
20 evaluate the broad-spectrum antimicrobial efficacy of  $\text{RuX}_2$  clusters. Bacterial suspension ( $1 \times$   
21  $10^8 \text{ CFU mL}^{-1}$ ) was treated as follows: Saline,  $\text{RuTe}_2$ ,  $\text{RuSe}_2$  and  $\text{RuS}_{2-x}$ . The final  
22 concentration of clusters is  $100 \mu\text{g mL}^{-1}$ . After incubation for 30 min in each group,  $100 \mu\text{L}$  of  
23 each bacterial suspension was spread on the LB solid agar plate and incubated at 37 °C for 24  
24 h to count the bacterial colonies.

### 25 **Live-Dead bacteria staining**

1 Initially, bacterial cells subjected to various treatments were collected via centrifugation  
2 (5000 rpm, 5 min) and washed 3 times with saline. Subsequently, the treated bacteria were  
3 stained in the dark with SYTO9 and PI (Shanghai Nonin Biological Technology Co., Ltd.) for  
4 30 min. The green and red fluorescence intensities of various groups were observed using a  
5 confocal laser scanning microscope.

#### 6 **ROS level of Bacterial**

7 The levels of reactive oxygen species (ROS) in bacteria were assessed using the  
8 fluorescent probe 2',7'-Dichlorofluorescein Diacetate (DCFH-DA, Solarbio, >97%). Bacteria  
9 were collected by centrifugation after various treatments and then incubated with DCFH-DA  
10 for 15 min under dark conditions. Subsequently, the fluorescence intensity was measured using  
11 flow cytometry.

#### 12 **Detection of bacterial ATP content**

13 After treatment with RuX<sub>2</sub> clusters at the concentrations of 100 µg mL<sup>-1</sup> for 12 h at 37 °C,  
14 the bacterial cells were mixed with an ATP extracting solution and then disrupted using an  
15 ultrasonic processor. The treated bacterial suspensions were then centrifuged at 10000 rpm for  
16 5 min at 4 °C. The supernatant was used to measure the ATP activity by the ATP content Assay  
17 Kit (Solarbio, China).

#### 18 **O-nitrophenyl-β-D-galactopyranoside (ONPG) assay**

19 The bacterial suspension (OD<sub>600</sub>=0.5) was harvested and incubated with ONPG (25 mM)  
20 solution for 1 h. Subsequently, the supernatant was collected by centrifugation, and its  
21 absorbance was measured at 405 nm.

#### 22 **Fluorescence imaging**

23 10 µL Rhodamine B (1 mg mL<sup>-1</sup>) added to RuS<sub>2-x</sub> (1 mg mL<sup>-1</sup>), and then incubated for  
24 overnight at 200 rpm. RhB-labeled RuS<sub>2-x</sub> were collected by centrifugation and washed three  
25 times with double distilled water. The bacterial suspension (OD<sub>600</sub>=0.5) were incubated with

1 RhB-labeled RuX<sub>2-x</sub> (100 µg mL<sup>-1</sup>) 1 h. After co-incubation, the bacterial was collected and the  
2 fluorescence images were captured by fluorescence microscope.

### 3 **Crystal Violet (CV) staining**

4 200 µL of *E. coil* (OD = 0.1) was added to the 96-well plate and cultured at 37°C for 48  
5 h to form a biofilm. Then, the mature biofilms were gently washed three times with PBS. The  
6 well plate was replaced with fresh medium containing RuX<sub>2</sub> clusters (100 µg mL<sup>-1</sup>) or PBS and  
7 co-cultured at 37°C for another 6 h. 200 µL of CV (Solarbio, AR) solution (1%) was added to  
8 the well plate and incubated for 10 min at room temperature. The CV solution was removed  
9 and washed with DI water. The fixed dye was dissolved with 100 µL of 33% (v/v) acetic acid  
10 and incubated for 30 min at room temperature. The biomass of the biofilm was quantified by  
11 recording the absorbance at 595 nm using a microplate reader.

### 12 ***In vivo* antibacterial and wound-healing experiment**

13 All experimental mice (BALB/c, 6-8 weeks) were purchased from Tianjin Yi Shengyuan  
14 Gene Technology Co., Ltd. All animal procedures followed the ethics and ethics rules of the  
15 Animal Committee and complying with the principles of animal protection, animal welfare and  
16 ethics (YSY-DWLL-2024545). A circular wound with a diameter of 8.0 mm was created on  
17 the back of each mouse, and 25 µL of *E.coli* suspension (10<sup>8</sup> CFU mL<sup>-1</sup>) was placed on the  
18 wounds for constructing the infected wound model. After 24 h, the infected mice were  
19 randomly divided into four groups (n = 6): (1) Saline, (2) RuTe<sub>2</sub>, (3) RuSe<sub>2</sub> and (4) RuS<sub>2-x</sub>. The  
20 mice were treated on days 1, 3, 5, and 7, respectively, with daily monitoring of wound changes  
21 and mouse weights. After 10 days of treatment, the mice were sacrificed, and wound skin  
22 tissues, as well as organ tissues (heart, liver, spleen, lung and kidneys), were collected for  
23 hematoxylin-eosin (HE) staining analysis.

### 24 **Cytotoxicity and biocompatibility**

1 Cortical microvessel endothelial cells (CMEC) and macrophage cells (RAW264.7) were  
2 plated in a 96-well plate with 100  $\mu$ L DMEM medium and incubated at 37 °C. After 12 h, the  
3 cells were exposed to various concentrations of RuX<sub>2</sub> clusters for 24 h. Subsequently, Cell  
4 viability was assessed using a Cell Counting Kit-8 (CCK-8) assay. On day 10, blood samples  
5 were collected from the mice for biochemical analysis. Additionally, major organs were  
6 harvested after 10 days for pathological examination.

#### 7 **Statistical analysis**

8 Data are presented as mean  $\pm$  standard deviation (SD) or standard error of the mean  
9 (SEM). Comparison of means between two groups was accomplished by the Student's t-test.  
10 For multiple comparison, one- way analysis of variance (ANOVA) was used to assess  
11 difference in means among groups. \* $P < 0.05$ , \*\* $P < 0.01$ , and \*\*\* $P < 0.001$ , analyzed by  
12 ANOVA.

13

14

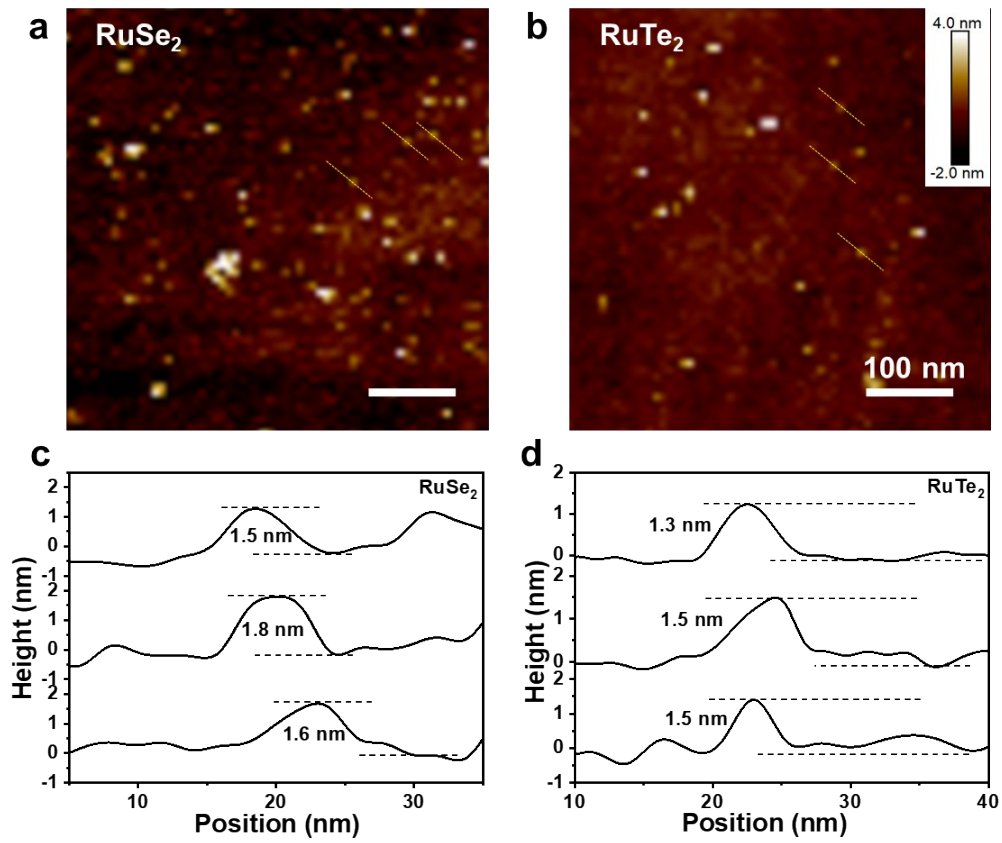

1  
 2 **Figure S1.** AFM image of (a) RuSe<sub>2</sub>, (b) RuTe<sub>2</sub> clusters and the corresponding height profile  
 3 (c-d).  
 4

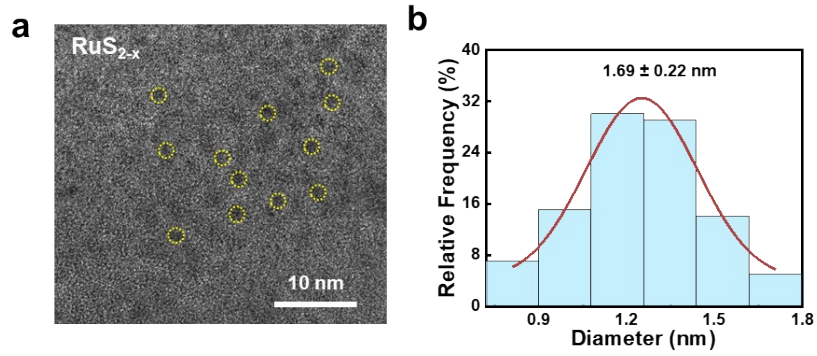

1  
2 **Figure S2.** TEM image of (a) RuS<sub>2-x</sub> and corresponding size distribution (b).

3  
4  
5

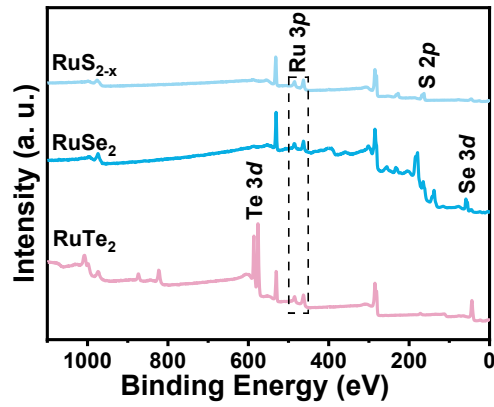

6  
7 **Figure S3.** XPS full spectra of RuX<sub>2</sub> clusters.

8

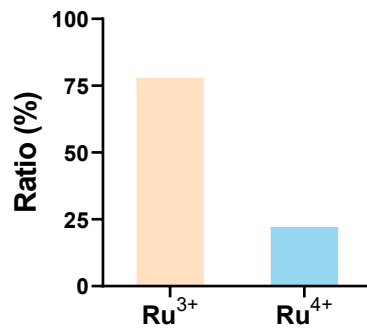

9  
10 **Figure S4.** Ratios of Ru<sup>3+</sup> and Ru<sup>4+</sup> in RuS<sub>2-x</sub> clusters according to XPS results.

11

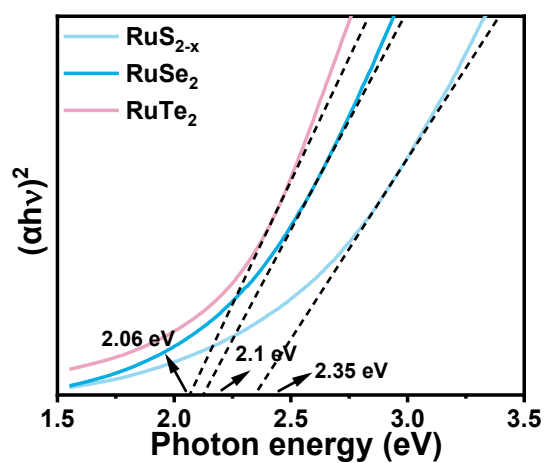

1  
2 **Figure S5.** Plot analysis of optical bandgap of RuX<sub>2</sub> clusters.

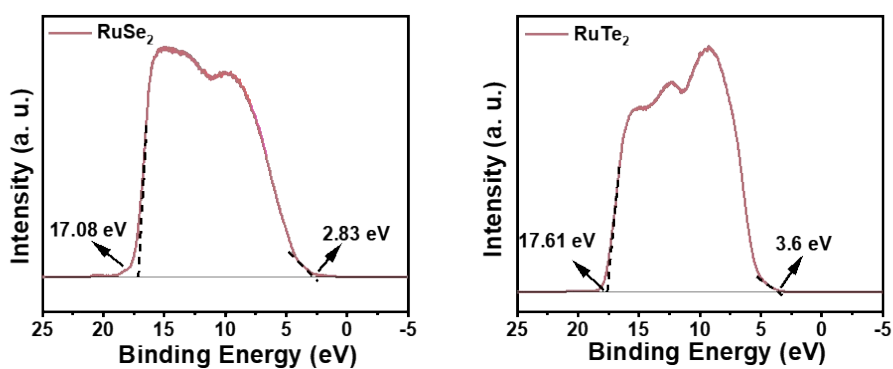

3  
4  
5  
6 **Figure S6.** UPS spectra measured by He I ( $h\nu = 21.22$  eV) spectra. The secondary electron  
7 cutoff (left). The valence band (right)

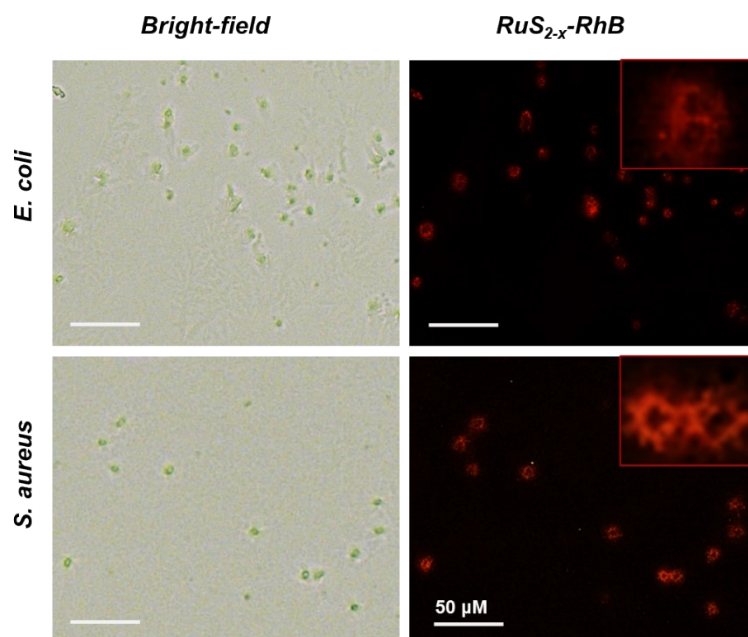

1  
2 **Figure S7.** Fluorescent images of *E. coli* and *S. aureus* incubated with RhB-labeled RuS<sub>2-x</sub>.

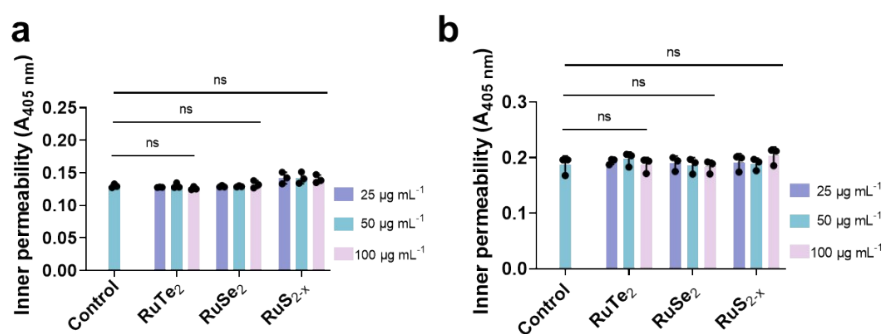

3  
4 **Figure S8.** Permeability of bacterial membrane determined by ONPG assay analysis of *E. coli*  
5 (a) and *S. aureus* (b) after RuX<sub>2</sub> clusters treatments.

6

1

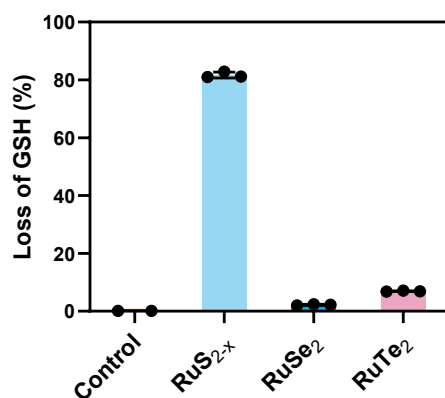

2

3

4

5

**Figure S9.** Quantitative analysis of GSH loss in different reaction systems.

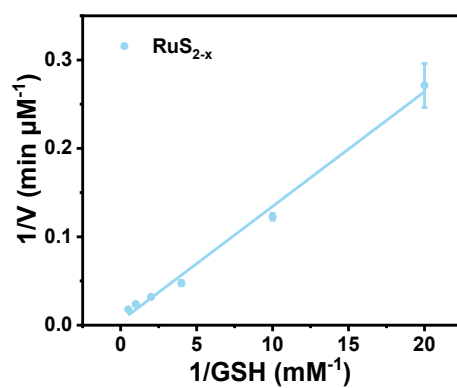

6

7

**Figure S10.** Double-reciprocal plots of kinetic constants for RuS<sub>2-x</sub> of GSH.

8

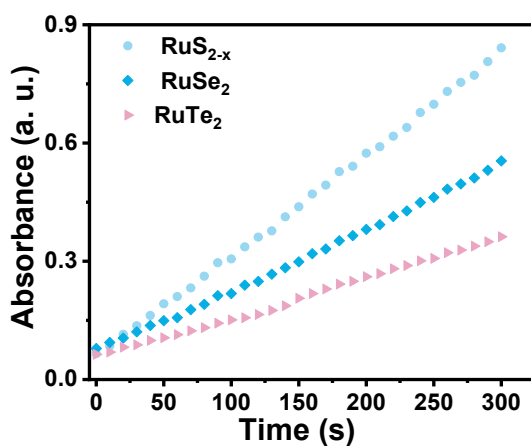

9

10

11

12

13

**Figure S11.** Time-dependent absorption changes of TMB in the presence of RuX<sub>2</sub> and H<sub>2</sub>O<sub>2</sub>.

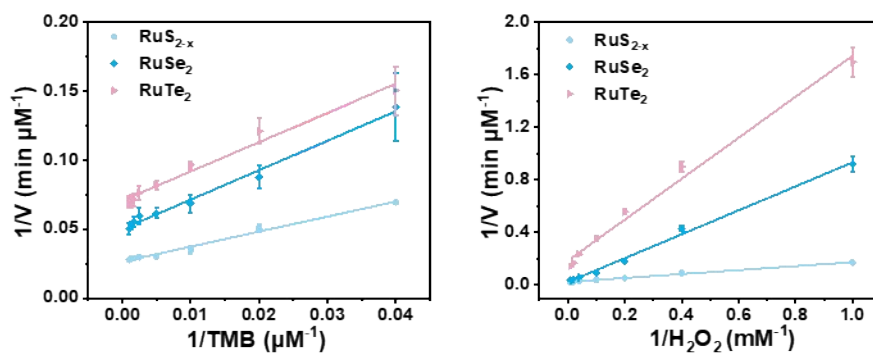

1

2 **Figure S12.** Double-reciprocal plots of kinetic constants for different samples of TMB and  
 3  $H_2O_2$ .

4

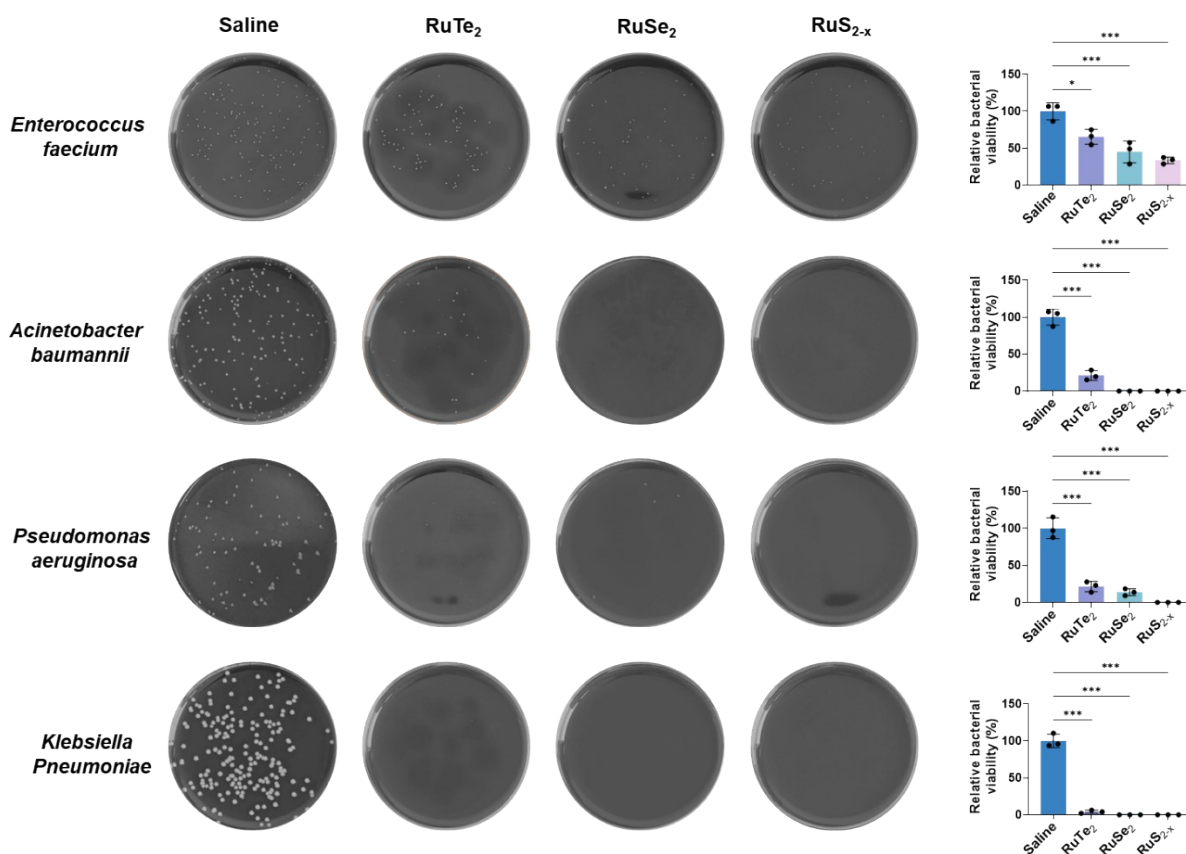

5

6 **Figure S13.** Representative photographs of agar plates and the relative bacterial viability of  
 7 *Enterococcus faecium*, *Acinetobacter baumannii*, *Pseudomonas aeruginosa* and *Klebsiella*  
 8 *Pneumoniae* with  $RuX_2$  clusters treatments.

9

10

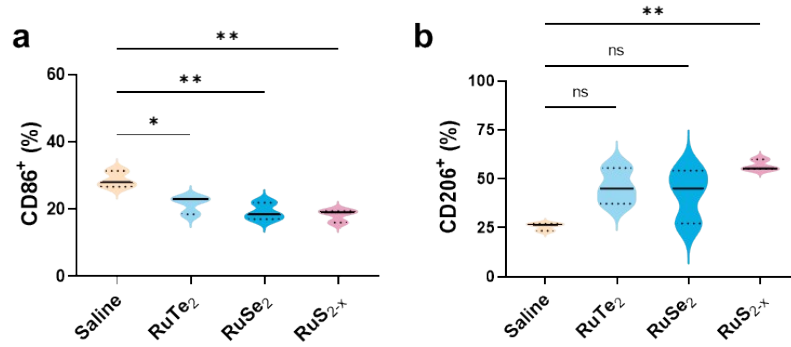

1

2 **Figure S14.** Statistical analysis of (a) CD86, (b) CD206 content after different treatments. n=3  
 3 per group. Data are presented mean ± SEM; \**p* < 0.05, \*\**p* < 0.01, and \*\*\**p* < 0.001 versus  
 4 with the control group, analyzed by ANOVA.

5

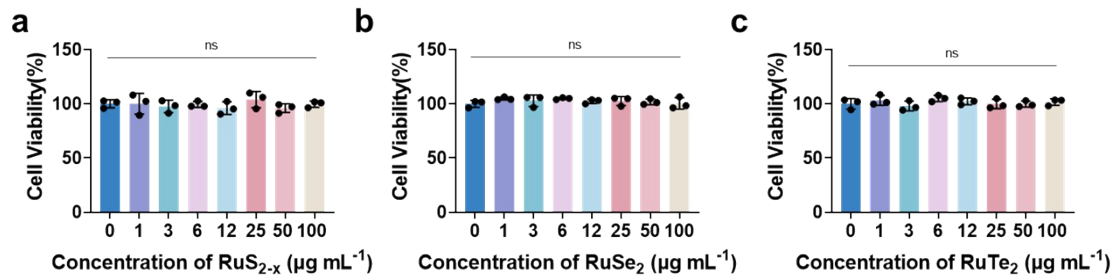

6

7 **Figure S15.** Cytotoxicity of different concentrations of RuS<sub>2-x</sub> clusters on macrophage cells  
 8 (RAW264.7). n=3 per group. Data are presented mean ± SEM; \**p* < 0.05, \*\**p* < 0.01, and \*\*\**p*  
 9 < 0.001 versus with the control group, analyzed by ANOVA.

10

11

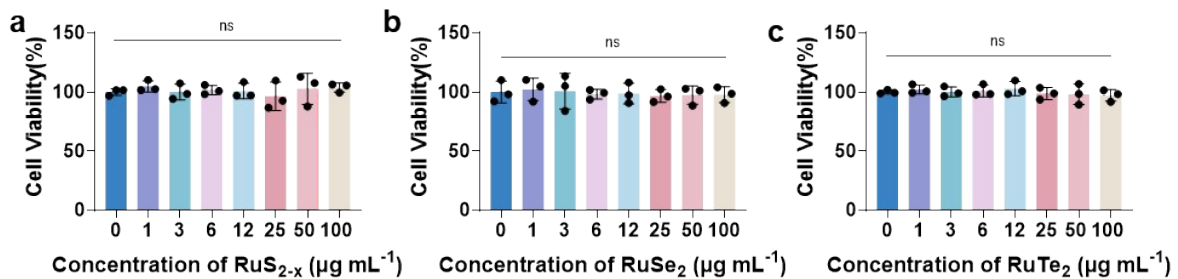

12

13 **Figure S16.** *In vitro* cytotoxicity of the RuX<sub>2</sub> clusters on cortical microvessel endothelial cells.  
 14 n=3 per group. Data are presented mean ± SEM; \**p* < 0.05, \*\**p* < 0.01, and \*\*\**p* < 0.001 versus  
 15 with the control group, analyzed by ANOVA.

16

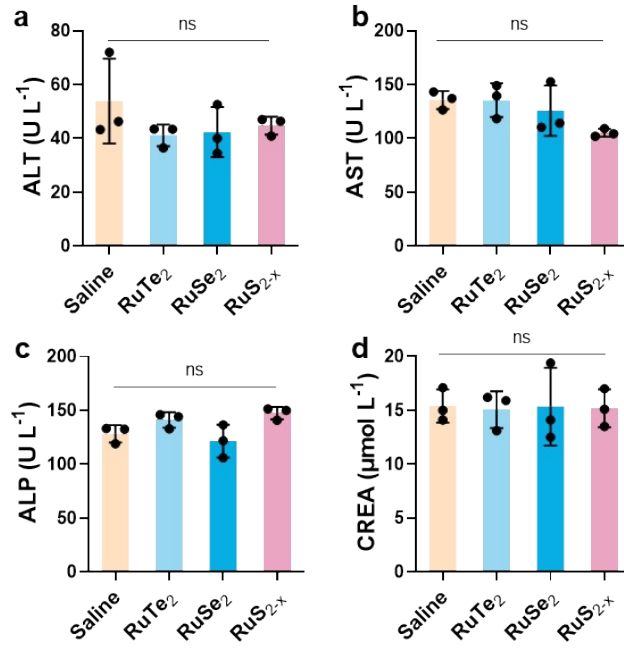

1  
2 **Figure S17.** Levels of different blood biochemistry indexes with various treatments after 10  
3 days. The results show mean and standard error of the mean of alanine aminotransferase (ALT),  
4 aspartate aminotransferase (AST), alkaline phosphatase (ALP) and creatinine (CREA), n=3 per  
5 group. Data are presented mean ± SEM; \**p* < 0.05, \*\**p* < 0.01, and \*\*\**p* < 0.001 versus with  
6 the control group, analyzed by ANOVA.

7

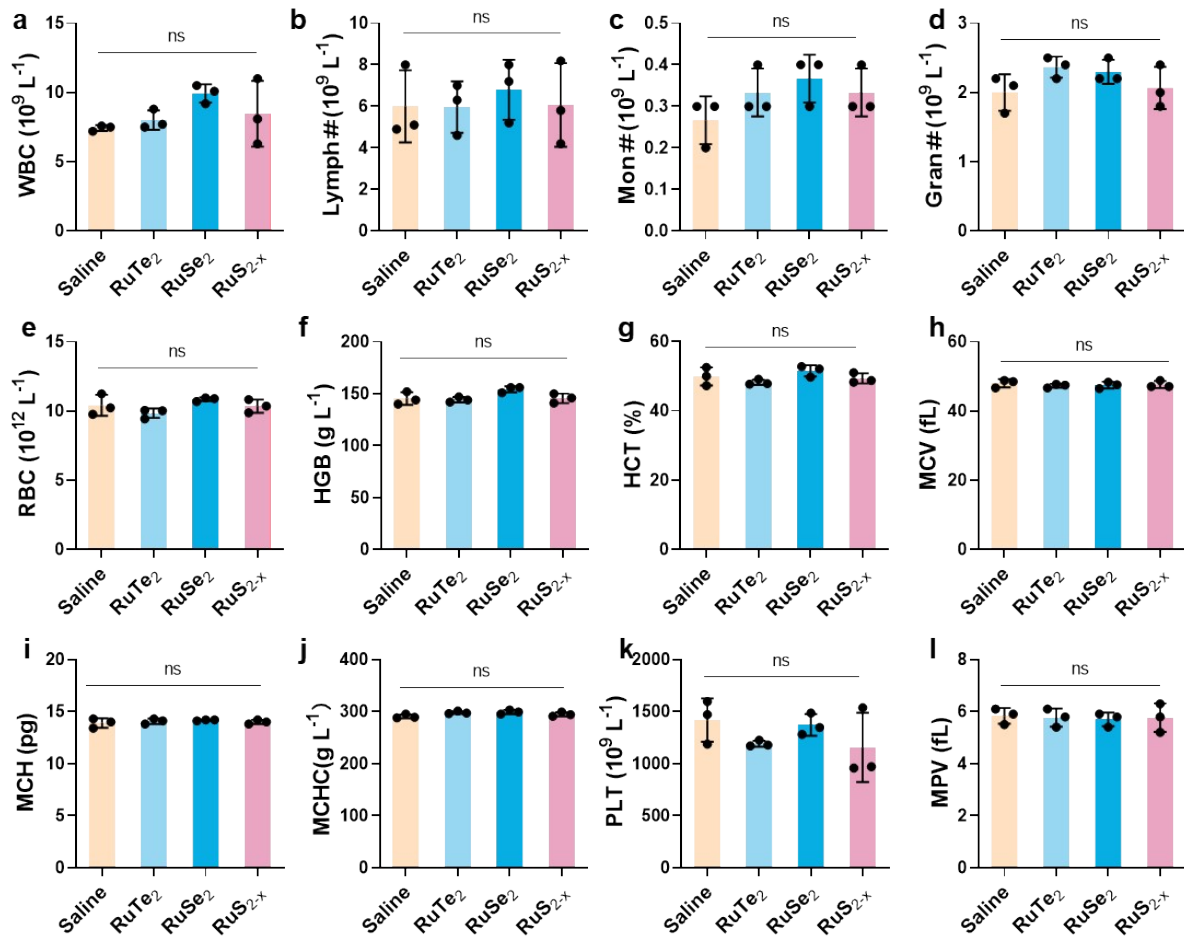

1  
2  
3  
4  
5  
6  
7  
8  
9  
10

**Figure S18.** Levels of different blood routine indexes with various treatments after 10 days. The results show the mean and standard error of the mean of white blood cells (WBC), lymphocyte (Lymph), monocyte (Mon), granulocyte (Gran), red blood cell (RBC), hemoglobin (HGB), hematocrit (HCT), mean corpuscular volume (MCV), mean corpuscular hemoglobin (MCH), mean corpuscular hemoglobin concentration (MCHC), platelets (PLT), and mean platelet volume (MPV), n=3 per group. Data are presented as mean ± SEM; \**p* < 0.05, \*\**p* < 0.01, and \*\*\**p* < 0.001 versus the Sham group, analyzed by ANOVA.

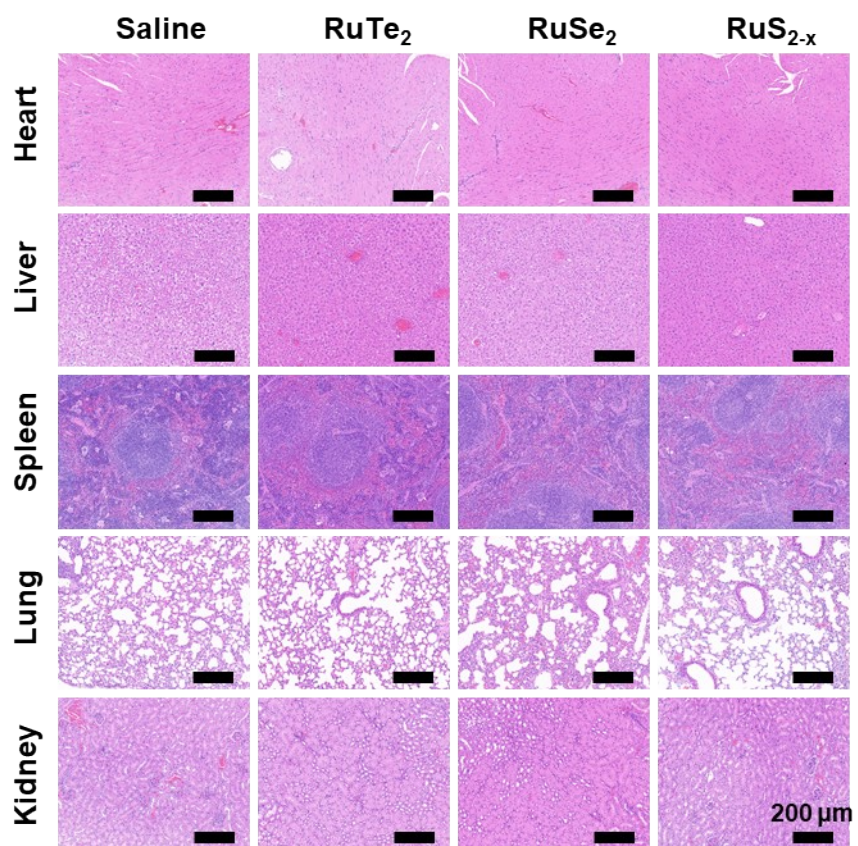

1  
2

3 **Figure S19.** Histotoxicological assessment of major organs (heart, spleen, liver and kidney)  
4 stained with hematoxylin and eosin (H&E) after 10 days of different treatments. Scale bar is  
5 200 μm, n=3 per group. No significant toxic responses were found in all organs.

1

2 **Table S1.** Kinetic parameters for the GSHOx-like activity of different samples

| <b>Samples</b>                 | <b>[E]<br/>(M)</b>     | <b><math>K_m</math><br/>(mM)</b> | <b><math>V_{max}</math><br/>(<math>\mu\text{M min}^{-1}</math>)</b> | <b><math>K_{cat}</math><br/>(<math>\text{min}^{-1}</math>)</b> | <b>References</b> |
|--------------------------------|------------------------|----------------------------------|---------------------------------------------------------------------|----------------------------------------------------------------|-------------------|
| Cu-N <sub>4</sub>              | $1.72 \times 10^{-6}$  | 0.288                            | 33.9                                                                | 19.7                                                           | [3]               |
| Cu-NS                          | $1.51 \times 10^{-6}$  | 0.33                             | 51.12                                                               | 37.8                                                           | [3]               |
| Fe <sub>3</sub> O <sub>4</sub> | $2.02 \times 10^{-7}$  | 0.53                             | 3.97                                                                | 19.7                                                           | [4]               |
| Fe-N <sub>4</sub>              | $2.73 \times 10^{-9}$  | 0.13                             | 36.42                                                               | 13300                                                          | [4]               |
| Zn-NC                          | $5.42 \times 10^{-5}$  | 1.3                              | 1.63                                                                | 0.03                                                           | [5]               |
| Ga-NC                          | $3.70 \times 10^{-6}$  | 0.89                             | 1.76                                                                | 0.474                                                          | [5]               |
| Ga/Zn-NC                       | $2.78 \times 10^{-6}$  | 0.58                             | 13.14                                                               | 4.74                                                           | [5]               |
| Pd Sazyme                      | $6.77 \times 10^{-6}$  | 0.24                             | 1182                                                                | 175                                                            | [6]               |
| S-N/Ni<br>PSAE                 | $3.27 \times 10^{-6}$  | 0.83                             | 6720                                                                | 2060                                                           | [7]               |
| MnSA-N <sub>3</sub> -C         | -                      | 0.3                              | 120                                                                 | 4240                                                           | [8]               |
| MnSA-N <sub>4</sub> -C         | -                      | 0.43                             | 85.8                                                                | 2590                                                           | [8]               |
| Fe-N-C                         | $3.21 \times 10^{-6}$  | 3.11                             | 1674                                                                | 512                                                            | [9]               |
| Fe-S/N-C                       | $2.59 \times 10^{-6}$  | 1                                | 20760                                                               | 8020                                                           | [9]               |
| RuS <sub>2-x</sub>             | $6.69 \times 10^{-10}$ | 0.75                             | 76.52                                                               | 114000                                                         | This work         |

3

1 **Table S2.** Comparison of kinetic parameters for HRP and RuX<sub>2</sub> clusters.

| Samples                  | [S]<br>(M)             | Substrates                    | $K_m$<br>(mM) | $V_{max}$<br>( $\mu\text{M min}^{-1}$ ) | $K_{cat}$<br>( $\text{min}^{-1}$ ) | $K_{cat}/K_m$<br>( $\text{mM min}^{-1}$ ) |
|--------------------------|------------------------|-------------------------------|---------------|-----------------------------------------|------------------------------------|-------------------------------------------|
| <b>RuS<sub>2-x</sub></b> | $5.35 \times 10^{-10}$ | TMB                           | 0.36          | 37.38                                   | $6.98 \times 10^4$                 | $1.94 \times 10^5$                        |
|                          |                        | H <sub>2</sub> O <sub>2</sub> | 9.20          | 51.76                                   | $9.67 \times 10^4$                 | $1.05 \times 10^4$                        |
| <b>RuSe<sub>2</sub></b>  | $8.00 \times 10^{-10}$ | TMB                           | 0.38          | 19.75                                   | $2.47 \times 10^4$                 | $6.50 \times 10^4$                        |
|                          |                        | H <sub>2</sub> O <sub>2</sub> | 25.41         | 35.63                                   | $4.45 \times 10^4$                 | $1.75 \times 10^3$                        |
| <b>RuTe<sub>2</sub></b>  | $1.28 \times 10^{-9}$  | TMB                           | 0.39          | 14.67                                   | $1.15 \times 10^4$                 | $2.94 \times 10^4$                        |
|                          |                        | H <sub>2</sub> O <sub>2</sub> | 33.38         | 10.98                                   | $8.58 \times 10^4$                 | $2.57 \times 10^2$                        |
| <b>HRP</b>               |                        | TMB                           | 0.552         | 0.13                                    | $1.63 \times 10^4$                 | $2.95 \times 10^4$                        |
|                          |                        | H <sub>2</sub> O <sub>2</sub> | 1.56          | 0.08                                    | $1 \times 10^4$                    | $6.41 \times 10^4$                        |

1

- 2 1. J. Guo, X. Pan, C. Wang, Z. Huang, Z. Huang, J. Deng, Q. Wu, Y. Sun, X. Xu, D.  
3 Hou and H. Liu, *Adv. Mater.*, **2025**, e06721.
- 4 2. G. Wang, H. Feng, A. Gao, Q. Hao, W. Jin, X. Peng, W. Li, G. Wu and P. K. Chu,  
5 *ACS Appl. Mater. Interfaces*, **2016**, *8*, 24509-24516.
- 6 3. R. Niu, Y. Liu, B. Xu, R. Deng, S. Zhou, Y. Cao, W. Li, H. Zhang, H. Zheng, S. Song,  
7 Y. Wang and H. Zhang, *Adv. Mater.*, **2024**, *36*, 2312124.
- 8 4. X. Zhu, J. Wu, R. Liu, H. Xiang, W. Zhang, Q. Chang, S. Wang, R. Jiang, F. Zhao, Q.  
9 Li, L. Huang, L. Yan and Y. Zhao, *ACS Nano*, **2022**, *16*, 18849-18862.
- 10 5. S. Zhong, Z. Zhang, Z. Wang, Q. Zhao, W. Chen, G. Chen, Z. Jiang, Q. Cai, L. Gong,  
11 Y. Lai, D. Wang and L. Li, *J. Am. Chem. Soc.*, **2025**, *147*, 15814-15826.
- 12 6. M. Chang, Z. Hou, M. Wang, C. Yang, R. Wang, F. Li, D. Liu, T. Peng, C. Li and J.  
13 Lin, *Angew. Chem., Int. Ed.*, **2021**, *60*, 12971-12979.
- 14 7. Y. Zhu, W. Wang, P. Gong, Y. Zhao, Y. Pan, J. Zou, R. Ao, J. Wang, H. Cai, H.  
15 Huang, M. Yu, H. Wang, L. Lin, X. Chen and Y. Wu, *ACS Nano*, **2023**, *17*, 3064-  
16 3076.
- 17 8. Y. Wang, A. Cho, G. Jia, X. Cui, J. Shin, I. Nam, K.-J. Noh, B. J. Park, R. Huang and  
18 J. W. Han, *Angew. Chem., Int. Ed.*, **2023**, *62*, e202300119.
- 19 9. W. Liu, Q. Chen, J. Wu, F. Zhang, L. Han, J. Liu, H. Zhang, Z. Hao, E. Shi, Y. Sun, R.  
20 Zhang, Y. Wang and L. Zhang, *Adv. Funct. Mater.*, **2024**, *34*, 2312308.
- 21
